# Supplementary material for: Distinct patterns of complex rearrangements and a mutational signature of microhomeology are frequently observed in PLP1 copy number gain structural variants
Source: PubMed Central journal article supplement (PMC6902434; doi:10.1186/s13073-019-0676-0), 2019-12-09
Supplement: 13073_2019_676_MOESM2_ESM.pdf [file 13073_2019_676_MOESM2_ESM.pdf]

**Table S1.** Samples with single duplications at the *PLP1* locus.

| Single duplication |            |                          |
|--------------------|------------|--------------------------|
| No                 | Individual | Size of duplication (kb) |
| 1                  | BAB8921    | 666*                     |
| 2                  | BAB8922    | 475                      |
| 3                  | BAB8925    | 429*                     |
| 4                  | BAB8926    | 534                      |
| 5                  | BAB8929    | 513                      |
| 6                  | BAB8930    | 555                      |
| 7                  | BAB8932    | 221*                     |
| 8                  | BAB8933    | 551                      |
| 9                  | BAB8935    | 340                      |
| 10                 | BAB8939    | 705*                     |
| 11                 | BAB8942    | 389                      |
| 12                 | BAB8943    | 516                      |
| 13                 | BAB8944    | 562                      |
| 14                 | BAB8945    | 440                      |
| 15                 | BAB8946    | 362                      |
| 16                 | BAB8947    | 367                      |
| 17                 | BAB8948    | 423                      |

| Single duplication |            |                          |
|--------------------|------------|--------------------------|
| No                 | Individual | Size of duplication (kb) |
| 18                 | BAB8949    | 998                      |
| 19                 | BAB8950    | 429                      |
| 20                 | BAB8951    | 488                      |
| 21                 | BAB8952    | 427                      |
| 22                 | BAB8953    | 425                      |
| 23                 | BAB8954    | 4,484                    |
| 24                 | BAB8956    | 758                      |
| 25                 | BAB8957    | 949                      |
| 26                 | BAB8958    | 257*                     |
| 27                 | BAB8961    | 841                      |
| 28                 | BAB8963    | 611                      |
| 29                 | BAB8966    | 397                      |
| 30                 | BAB8967    | 683                      |
| 31                 | BAB8968    | 122*                     |
| 32                 | BAB8969    | 404                      |
| 33                 | BAB8971    | 366*                     |

\*Estimated size based on aCGH

**Table S2.** A summary of genomic rearrangements, coordinates and breakpoint junctions in the cohort of 50 PMD patients

| Individual | Array pattern | Segment size (kb) | Coordinates based on sequences junction, if not achieve they are estimated based aCGH and marked by * | Rearrangement pattern based on Jct sequencing                                     | Coordinates Based on the sequenced Jct (if achieved) | Features of JPs (nucleotides with microhomology /microhomeology are shown as upper case letters and two surrounding Nts by lower case). Gaps in microhomeologies are shown by dash | Inserted sequence () Deleted sequence <> Point mutation [] at join-points                                                                                    | Chimeric element   | Junction in repetitive elements/LCRs              |
|------------|---------------|-------------------|-------------------------------------------------------------------------------------------------------|-----------------------------------------------------------------------------------|------------------------------------------------------|------------------------------------------------------------------------------------------------------------------------------------------------------------------------------------|--------------------------------------------------------------------------------------------------------------------------------------------------------------|--------------------|---------------------------------------------------|
| 8920       | DUP1          | 368               | 102739577<br>103107466                                                                                | DUP<br>NML<br>INV/DUP                                                             | (+)103107466<br>(-)111181107                         | 74bp Nt identity at Jct                                                                                                                                                            | No                                                                                                                                                           | Yes (93% identity) | LIPA5/LIPA3                                       |
|            | DUP2          | 211               | 110969769<br>111181107                                                                                |                                                                                   | (-)102739577<br>(+)110969769                         | caCTGAcc                                                                                                                                                                           | No                                                                                                                                                           | No                 | AluSq2/-                                          |
| 8921       | DUP           | 666               | *102476739<br>103143213                                                                               | DUP;<br>Insertional<br>translocation                                              | Y(+)23730469<br>X(+)103143213                        | No                                                                                                                                                                                 | ca(T)gt                                                                                                                                                      | No                 | -/ LCR Y                                          |
| 8922       | DUP           | 475               | 102713559<br>103188774                                                                                | Tandem DUP                                                                        | (+)102713559<br>(+)103188774                         | gaTCtt                                                                                                                                                                             | No                                                                                                                                                           | No                 | LIPA4/LCRC                                        |
| 8923       | DUP1          | 642               | 98855903<br>99498194                                                                                  | DUP<br>NML<br>DUP                                                                 | (+)98855903<br>(+)103366577                          | No                                                                                                                                                                                 | at(GAA)tc                                                                                                                                                    | No                 | LIMC4/(TA)n                                       |
|            | DUP2          | 785               | 102581871<br>103366577                                                                                |                                                                                   | (+)99498194<br>(+)102581871                          | cgACAgA                                                                                                                                                                            | No                                                                                                                                                           | Yes (90% identity) | AluY/AluY                                         |
| 8924       | DUP1          | 112               | *102240280<br>*102352764                                                                              | DUP<br>NML<br>DUP<br>NML<br>DUP<br>or<br>DUP<br>NML<br>DUP<br>on H2<br>background | NA                                                   | NA                                                                                                                                                                                 | NA                                                                                                                                                           | NA                 | NA                                                |
|            | DUP2          | 866               | 102356657<br>*103224075                                                                               |                                                                                   | JP1<br>(-)103295890<br>(-)102660402                  | ttACaAgCAATat                                                                                                                                                                      | at(ATGGAGGTTAGA<br>GTAATGTGAGGGC<br>AT)ga                                                                                                                    | No                 | LTR (ERV1)/LTR<br>(ERV1-MaLR)/Chain<br>(ID: 1065) |
|            | DUP3          | 9                 | 102356655<br>*103305265                                                                               |                                                                                   | JP2<br>(-)102660369<br>(+)102356657                  | atGAGgaAAGtc                                                                                                                                                                       | The insertion is the<br>result of two<br>microhomeology-<br>mediated TS (JP1 &<br>JP2)                                                                       |                    |                                                   |
| 8925       | DUP           | 429               | *102716349<br>*103145619                                                                              | Tandem DUP                                                                        | NA                                                   | NA                                                                                                                                                                                 | NA                                                                                                                                                           | NA                 | NA                                                |
| 8926       | DUP           | 534               | 102793976<br>103322069                                                                                | Tandem DUP                                                                        | (+)102793974<br>(+)103322069                         | ccGAgc                                                                                                                                                                             | No                                                                                                                                                           | No                 | Chain (ID:<br>84669)/LCRA1b                       |
| 8928       | DUP           | 78                | 102138188<br>102215833                                                                                | DUP<br>NML<br>DUP                                                                 | (+)102215833<br>(+)102411921                         | ggATCTTCTGAta                                                                                                                                                                      | No                                                                                                                                                           | No                 | -/LIPA15                                          |
|            | DUP           | 712               | 102411921<br>103123574                                                                                |                                                                                   | (+)102138188<br>(+)103123574                         | gaAGGtt                                                                                                                                                                            | No                                                                                                                                                           | No                 | Chain (ID: 17282)<br>/LIPA3                       |
| 8929       | DUP           | 513               | 102651193<br>103164455                                                                                | Tandem DUP                                                                        | (+)102651193<br>(+)103164455                         | No                                                                                                                                                                                 | ctG(gcattgg)ag<br>Rep errors in Jct<br>flanking regions:<br>(-)102651263-74<br>ag<AAAAA>ac<br>(-)102651247-54<br>aa<A>gg<br>(-)102651206-19<br>ga<CTACAAA>tg | No                 | Chain (ID:95091)/<br>Chain (ID: 231647)           |

|      |      |       |                          |                       |                                     |                         |                                                                                      |                       |                                      |
|------|------|-------|--------------------------|-----------------------|-------------------------------------|-------------------------|--------------------------------------------------------------------------------------|-----------------------|--------------------------------------|
| 8930 | DUP  | 555   | 102712023<br>103267065   | Tandem DUP            | (+)102712024<br>(+)103267065        | ggTTCTgTTgAtt           | No                                                                                   | No                    | LIPA4/Chain (ID: 1065)               |
| 8931 | DUP  | 283   | *102940231<br>*103223662 | DUP<br>NML<br>DEL     | NA                                  | NA                      | NA                                                                                   | NA                    | Probable<br>LCRA1a/LCRA1b<br>chimera |
|      | DEL  | 17    | *103328530<br>*103345510 |                       | NA                                  | NA                      | NA                                                                                   | NA                    | NA                                   |
| 8932 | DUP  | 221   | *102842768<br>*103064114 | NA                    | NA                                  | NA                      | NA                                                                                   | NA                    | NA                                   |
| 8933 | DUP  | 551   | 102681876<br>103315029   | Tandem DUP            | (+)102681876<br>(+)103315029        | No                      | gg(GATCCCAA)tg                                                                       | No                    | LTR37A/LCRA1b                        |
| 8934 | DUP1 | 313   | 96605093<br>96917885     | DUP<br>NML<br>INV/DUP | JP1<br>(+)96917885<br>(-)103158716  | ggCATatGAGAAca          | at(ATGAGAATCATG<br>AAATTAGCAATCAA<br>ACTTGTC)ga                                      | No                    | -/ NA                                |
|      |      |       |                          |                       | JP2<br>(-)103158754<br>(-)103163269 | tcGACacATCaTAGta        | The insertion is the<br>result of<br>microhomeology-<br>mediated TSs at JP1 &<br>JP2 | No                    | NA/ LIMeg                            |
|      | DUP2 | 398   | 102764968<br>103163269   |                       | (-)96605093<br>(+)102764968         | 56bp Nt identity at Jct | No                                                                                   | Yes (89%<br>identity) | AluSx1/AluSg                         |
| 8935 | DUP  | 340   | 102708892<br>103048730   | Tandem DUP            | (+)102708892<br>(+)103048730        | ccTgc                   | ccT<TTTT>gc                                                                          | No                    | LIMC4/-                              |
| 8936 | DUP1 | 218   | *102746676<br>*102965077 | NA                    | NA                                  | NA                      | NA                                                                                   | NA                    | NA                                   |
|      | DUP2 | 20    | *102967589<br>*102988069 |                       |                                     |                         |                                                                                      |                       |                                      |
|      | DUP3 | 325   | *102993721<br>*103319046 |                       |                                     |                         |                                                                                      |                       |                                      |
| 8937 | DUP  | 341   | 102826552<br>*103258804  | DUP<br>QUAD<br>TRP    | (+)102826552<br>(+)103281547        | tcATCag                 | No                                                                                   | No                    | No                                   |
|      | QUAD | 22    | *103258804<br>103281547  |                       | NA                                  | NA                      | NA                                                                                   | NA                    | Presumed<br>LCR2/LCRA1b chimera      |
|      | TRP  | 17    | 103281547<br>*103305096  |                       | NA                                  | NA                      | NA                                                                                   | NA                    | Presumed<br>LCR2/LCRA1b chimera      |
| 8938 | DUP1 | 63    | *101039766<br>*101103096 | DUP<br>TRP/INV<br>DUP | (-)103048340<br>(+)101420448        | No                      | 84bp insertion from<br>different templates                                           | No                    | LTR (HERV16-int)/-                   |
|      | TRP  | 317   | *101103096<br>101420448  |                       | NA                                  | NA                      | NA                                                                                   | NA                    | NA                                   |
|      | DUP2 | 1,628 | 101420448<br>103048340   |                       |                                     |                         |                                                                                      |                       |                                      |
| 8939 | DUP  | 705   | *102570985<br>*103275726 | NA                    | NA                                  | NA                      | NA                                                                                   | NA                    | NA                                   |

|      |                   |               |                                                        |                                                                    |                                                                                                                           |                                          |                                          |                                           |                                                                 |
|------|-------------------|---------------|--------------------------------------------------------|--------------------------------------------------------------------|---------------------------------------------------------------------------------------------------------------------------|------------------------------------------|------------------------------------------|-------------------------------------------|-----------------------------------------------------------------|
| 8940 | DUP1<br>&<br>DUP2 | 602<br><br>70 | 102637533<br>*103224075<br><br>103256194<br>*103305742 | DUP<br>NML<br>INV/DUP<br>or<br>a tandem DUP<br>on H2<br>background | (+)102637533<br>(-)103256177                                                                                              | caGCTCAG-GCagg                           | tc<TAGTGTG>[c]a                          | No                                        | <i>AluY/LTR (ERV1)</i>                                          |
| 8942 | DUP               | 389           | 102798929<br>103187725                                 | Tandem DUP                                                         | (+)102798929<br>(+)103187725                                                                                              | agACAcA                                  | ag<t>ACAcA                               | No                                        | -/LCRC                                                          |
| 8943 | DUP               | 516           | 102591617<br>103107622                                 | Tandem DUP                                                         | (+)102591617<br>(+)103107622                                                                                              | ggTACct                                  | No                                       | No                                        | MER74A/LIPA5                                                    |
| 8944 | DUP               | 562           | 102511210<br>103073638                                 | Tandem DUP                                                         | (+)102511210<br>(+)103073638                                                                                              | gtAAaAAagATTgACAt<br>g                   | No                                       | No                                        | -/LIME4a                                                        |
| 8945 | DUP               | 440           | 102942249<br>103382339                                 | Tandem DUP                                                         | (+)102942249<br>(+)103382339                                                                                              | gaGCTgt                                  | No                                       | No                                        | -/LTR (MER101)                                                  |
| 8946 | DUP               | 362           | 102801949<br>103163822                                 | Tandem DUP                                                         | (+)102801949<br>(+)103163822                                                                                              | No                                       | aa(TTG)at                                | No                                        | LIMA9/-                                                         |
| 8947 | DUP               | 367           | 102875648<br>103243088                                 | Tandem DUP                                                         | (+)102875648<br>(+)103243088                                                                                              | ttAAgAAcATgGtg                           | No                                       | No                                        | (LTR)<br>MLT1A0/LCRA1a                                          |
| 8948 | DUP               | 423           | 102845365<br>103268344                                 | Tandem DUP                                                         | (+)102845365<br>(+)103268344                                                                                              | gtGGCAtag                                | No                                       | No                                        | L1MC3/Chain (ID:<br>1065)                                       |
| 8949 | DUP               | 998           | 102304420<br>103280891                                 | Tandem DUP<br>with insertions                                      | JP1<br>(+)103280891<br>(+)102308763<br><br>JP2<br>(+)102308855<br>(-)102303992<br><br>JP3<br>(-)102303224<br>(+)102304420 | No<br><br>cgAgGGGAT-TAtt<br><br>ctGGGCgt | No<br><br>tt(CCCCTC)aa<br><br>No         | No<br><br>No<br><br>Yes (88%<br>identity) | -/LTR (MLT1L)<br><br>LTR (MLT1L)/ LIMA3<br><br><i>AluY/AluY</i> |
| 8950 | DUP               | 429           | 102757828<br>103186867                                 | Tandem DUP<br>with an<br>insertion                                 | (+)103186867<br>(-)103026494<br><br>(-)103026479<br>(+)102757828                                                          | gtGGGaT-ATat<br><br>caGCCct              | at(ATCCCCCTCA)g<br>c is the result of TS | No<br><br>No                              | LCR (Item:<br>chrX:102190370)/LCRC<br><br>No                    |
| 8951 | DUP               | 488           | 102812954<br>103301556                                 | Tandem DUP                                                         | (+)102812954<br>(+)103301556                                                                                              | No                                       | tt(GT)ct                                 | No                                        | -/LTR49-int & Chain<br>(ID: 7704)                               |
| 8952 | DUP               | 427           | 102682377<br>103109731                                 | Tandem DUP                                                         | (+)102682377<br>(+)103109731                                                                                              | gcCCctt                                  | g[c]CCCt ; T>C                           | No                                        | -/SINE (MIRb)                                                   |
| 8953 | DUP               | 425           | 102773657<br>103199137                                 | Tandem DUP                                                         | (+)102773657<br>(+)103199137                                                                                              | gcTGggTTTGGaGAacc                        | No                                       | No                                        | L1MC5/LCRC                                                      |
| 8954 | DUP               | 4,484         | 99762680<br>104246638                                  | Tandem DUP                                                         | (+)99762680<br>(+)104246638                                                                                               | ctAGct                                   | No                                       | No                                        | <i>AluY/-</i>                                                   |

|      |                   |               |                                                          |                                                                                      |                              |                                 |                                                                                       |    |                                         |                                      |
|------|-------------------|---------------|----------------------------------------------------------|--------------------------------------------------------------------------------------|------------------------------|---------------------------------|---------------------------------------------------------------------------------------|----|-----------------------------------------|--------------------------------------|
| 8955 | DUP1<br>&<br>DUP2 | 314<br><br>55 | 102925509<br>*103224075<br><br>103271708<br>*103305742   | DUP<br>NM<br>INV/DUP<br>or<br>a tandem DUP<br>on H2<br>background                    | (-)103271708<br>(+)102925509 | acCTGtActCaa                    | No                                                                                    | No | <i>Alu/L1PA12</i>                       |                                      |
| 8956 | DUP               | 758           | 102612197<br>103369941                                   | Tandem DUP                                                                           | (+)102612197<br>(+)103369941 | taTCTcc                         | No                                                                                    | No | Low complexity (C-rich)/NA              |                                      |
| 8957 | DUP               | 949           | 102150854<br>103099891                                   | Tandem DUP                                                                           | (+)102150854<br>(+)103099891 | tcAGTTAaaAaTct                  | No                                                                                    | No | -DNA (MER102a)                          |                                      |
| 8958 | DUP               | 257           | *102846600<br>*103104194                                 | NA                                                                                   | NA                           | NA                              | NA                                                                                    | NA | NA                                      |                                      |
| 8959 | DUP1              | 9             | 102671667<br>102680633                                   | DUP<br>NML<br>DUP<br>NML<br>DUP<br>Or<br>a tandem DUP<br>with inherited<br>deletions | (+)102680633<br>(+)102682913 | gtAaATGaCat                     | No                                                                                    | No | LTR(MLT1F2)/L1MD3                       |                                      |
|      | DUP2              | 96            | 102682913<br>102779006                                   |                                                                                      | (+)102779006<br>(+)102809177 | 29bp sequence identity<br>at JP | No                                                                                    | No | Chain (ID: 17283)/<br>Chain (ID: 84669) |                                      |
|      | DUP3              | 546           | 102809177<br>103175979                                   |                                                                                      | (+)102671667<br>(+)103175979 | tcAta                           | No                                                                                    | No | DNA(Tigger3b)/LCRC                      |                                      |
| 8960 | DUP1<br>&<br>DUP2 | 694<br><br>68 | *102546322<br>*103224075<br><br>*103258805<br>*103305742 | DUP<br>NML<br>INV/DUP<br>or<br>a tandem DUP<br>on H2<br>background                   | NA                           | NA                              | NA                                                                                    | NA | NA                                      |                                      |
| 8961 | DUP               | 841           | 102341097<br>103181893                                   | Tandem DUP                                                                           | (+)102341097<br>(+)103181893 | ctCCAgc                         | No                                                                                    | No | <i>AluV/LCRC</i>                        |                                      |
| 8962 | DUP               | 63            | 102765476<br>102801040                                   | Two Tandem<br>DUPs                                                                   | (+)102801040<br>(+)102765476 | No                              | 170bp insertion from<br>two known region and<br>small insertions of<br>unknown origin | No | -/L1PB2/-/ LIMA9                        |                                      |
|      | DUP               | 177           | 102929346<br>103106237                                   |                                                                                      | (+)103106237<br>(+)102929346 | ccAtt                           | No                                                                                    | No | -/LIME3A                                |                                      |
| 8963 | DUP               | 611           | 102678485<br>103289950                                   | Tandem DUP                                                                           | (+)102678485<br>(+)103289950 | No                              | tc(CCAA)gc                                                                            | No | L1M1/L1PA8 and Chain<br>(ID: 118438)    |                                      |
| 8964 | DUP               | 533           | 102560352<br>103093169                                   | DUP<br>TRP/INV<br>DUP                                                                | (+)102560352<br>(-)103093169 | tgCTGA-AAAtTta                  | No                                                                                    | No | LIMEc/SINE(MIRc)                        |                                      |
|      | TRP               | 130           | 103093169<br>*103224075                                  |                                                                                      |                              |                                 |                                                                                       |    |                                         |                                      |
|      | DUP               | 82            | *103224075<br>*103305742                                 |                                                                                      |                              |                                 | NA                                                                                    | NA | NA                                      | Presumed<br>LCRA1a/LCRA1b<br>chimera |

|      |      |     |                          |                                                                 |                                     |                 |                    |     |                                       |                                      |
|------|------|-----|--------------------------|-----------------------------------------------------------------|-------------------------------------|-----------------|--------------------|-----|---------------------------------------|--------------------------------------|
| 8965 | DUP1 | 456 | 102319763<br>102775516   | DUP<br>NML<br>DUP<br>With two<br>insertions at<br>each junction | JP1<br>(+)102775516<br>(+)103352834 | No              | No                 | Yes | Chain (ID: 17283)/<br>LCRD            |                                      |
|      |      |     |                          |                                                                 | JP2<br>(+)103352851<br>(+)103281343 | atGTAfTTTCtGTgc | No                 | No  | No                                    | LCRD/-                               |
|      |      |     |                          |                                                                 | JP3<br>(+)103281363<br>(+)102836592 | tgGAa-cAGga     | GAa[c]AG(g)aa; T>C | No  | No                                    | -/L1PA11                             |
|      | DUP2 | 557 | 102836592<br>103352823   |                                                                 | JP4<br>(+)103352823<br>(-)102775559 | No              | ga(GTAA)gt         | No  | -/Chain (ID: 17283)                   |                                      |
|      |      |     |                          |                                                                 | JP5<br>(-)102775516<br>(-)102775657 | No              | ct(GTG)aa          | No  | Chain (ID:17283)/Chain<br>(ID: 17283) |                                      |
|      |      |     |                          |                                                                 | JP6<br>(-)102775578<br>(+)102319763 | aaGtTGTCAGat    | at(ACAT)tt         | No  | Chain (ID:<br>17283)/LCRD             |                                      |
| 8966 | DUP  | 397 | 103175456<br>102778246   | Tandem DUP                                                      | (+)103175456<br>(+)102778246        | NA              | gg(GGGACTG)ct      | No  | LIME1/LCRC                            |                                      |
| 8967 | DUP  | 683 | 102364351<br>103057067   | Tandem DUP                                                      | (+)102364351<br>(+)103057067        | tgGATCgAagTGct  | No                 | No  | LTR(MER11A)/-                         |                                      |
| 8968 | DUP  | 122 | *102943944<br>*103066669 | NA                                                              | NA                                  | NA              | NA                 | NA  | NA                                    |                                      |
| 8969 | DUP  | 404 | 102839729<br>103243779   | Tandem DUP                                                      | (+)102839729<br>(+)103243779        | No              | cg(TA)tg           | No  | LTR (MER89)/LCRA1a                    |                                      |
| 8970 | DUP  | 93  | *102899075<br>*103050977 | DUP<br>TRP/INV<br>DUP                                           | NA                                  | NA              | NA                 | NA  | NA                                    |                                      |
|      | TRP  | 59  | *103050977<br>*103224075 |                                                                 |                                     |                 |                    |     |                                       |                                      |
|      | DUP  | 82  | *103224075<br>*103305742 |                                                                 |                                     | NA              | NA                 | NA  | NA                                    | Presumed<br>LCRA1a/LCRA1b<br>chimera |
| 8971 | DUP  | 366 | *102938912<br>*103305265 | NA                                                              | NA                                  | NA              | NA                 | NA  | (Based on aCGH)<br>NA/LCRA1a          |                                      |

JP: Join-point, Nt: Nucleotide, Jct: Junction, NA: Not available, join-points are not resolved by Sanger sequencing, Dash (-): No repeat or repetitive element, Rep: replication.

**Table S3.** Original data from 7 studies on genomic rearrangements at the *PLP1* locus.

|  |                                          |                                     |                             |                          |                         |                          |                 | Meta-analysis without re-interpretation of published data |                  |   | This study only |   |
|--|------------------------------------------|-------------------------------------|-----------------------------|--------------------------|-------------------------|--------------------------|-----------------|-----------------------------------------------------------|------------------|---|-----------------|---|
|  | Woodward <i>et al.</i> 2005 <sup>a</sup> | Lee <i>et al.</i> 2007 <sup>b</sup> | Carvalho <i>et al.</i> 2012 | Bilir <i>et al.</i> 2013 | Beck <i>et al.</i> 2015 | Zhang <i>et al.</i> 2017 | This study 2017 | Total                                                     | % D <sup>c</sup> | % | % D             | % |

**A) Nature and pattern of CNV events based on array results<sup>d</sup>**

|                                           |                                                 |    |    |   |   |    |    |    |     |     |       |    |       |
|-------------------------------------------|-------------------------------------------------|----|----|---|---|----|----|----|-----|-----|-------|----|-------|
| Single DUP events                         |                                                 | NA | 7  | - | 4 | -  | 29 | 33 | 73  | 134 | 54.5  | 50 | 66.0  |
| Complex genomic rearrangement (CGR) event | Total DUP-NML-DUP (disregarding directionality) | NA | 3  | 1 | - | -  | 7  | 9  | 20  | 134 | 14.9  | 50 | 18.0  |
|                                           | Total DUP-TRP-DUP (disregarding directionality) | NA | 1  | - | - | 15 | 8  | 3  | 27  | 134 | 20.1  | 50 | 6.0   |
|                                           | Other complexities                              | NA | 3  | - | - | 1  | 5  | 5  | 14  | 134 | 10.4  | 50 | 10.0  |
|                                           | Total CGR events                                | NA | 7  | 1 | - | 16 | 20 | 17 | 61  | 134 | 45.5  | 50 | 34.0  |
| Total unique CNV events                   |                                                 | NA | 14 | 1 | 4 | 16 | 49 | 50 | 134 | 134 | 100.0 | 50 | 100.0 |

**B) Features of sequenced junctions<sup>e</sup>**

|                                     |    |    |    |    |    |    |    |     |          |       |    |       |
|-------------------------------------|----|----|----|----|----|----|----|-----|----------|-------|----|-------|
| Microhomology (>1 bp)               | 9  | 4  | -  | NA | 11 | 27 | 15 | 60  | 159      | 37.7  | 57 | 26.3  |
| One bp sequence match               | 1  | -  | -  | NA | 3  | 5  | 3  | 12  | 159      | 7.5   | 57 | 5.3   |
| Microhomeology                      | NA | NA | NA | NA | NA | NA | 19 | 25  | NE       | NE    | 57 | 33.3  |
| All insertions (>= 1bp)             | 1  | 2  | 1  | NA | 4  | 23 | 13 | 44  | 159      | 27.7  | 57 | 22.8  |
| Blunt end                           | 2  | -  | -  | NA | 2  | 2  | 2  | 6   | 159      | 3.8   | 57 | 3.5   |
| Chimeric <i>Alu</i> <sup>f</sup>    | 1  | NA | -  | NA | 3  | 5  | 3  | 12  | 142      | 8.5   | 57 | 5.3   |
| Chimeric LINE <sup>f</sup>          | 0  | NA | -  | NA | -  | 2  | 1  | 3   | 142      | 2.1   | 57 | 1.8   |
| NAHR <sup>g</sup>                   | 0  | NA | NA | NA | NA | -  | 1  | 1   | NE       | NE    | 57 |       |
| Total number of sequenced junctions | 12 | 5  | 2  | 0  | 21 | 62 | 57 | 159 | Variable | 100.0 | 57 | 100.0 |

|                                          |                                     |                             |                          |                         |                          |                 | Meta-analysis without re-interpretation of published data |                  |   | This study only |   |
|------------------------------------------|-------------------------------------|-----------------------------|--------------------------|-------------------------|--------------------------|-----------------|-----------------------------------------------------------|------------------|---|-----------------|---|
| Woodward <i>et al.</i> 2005 <sup>b</sup> | Lee <i>et al.</i> 2007 <sup>a</sup> | Carvalho <i>et al.</i> 2012 | Bilir <i>et al.</i> 2013 | Beck <i>et al.</i> 2015 | Zhang <i>et al.</i> 2017 | This study 2017 | Total                                                     | % D <sup>c</sup> | % | % D             | % |

C) Genomic architectures overlapping sequenced join-points<sup>d</sup>

|                                                                                                                                                                        |                      |     |     |     |    |     |     |     |     |     |      |     |       |
|------------------------------------------------------------------------------------------------------------------------------------------------------------------------|----------------------|-----|-----|-----|----|-----|-----|-----|-----|-----|------|-----|-------|
| PMD-LCR                                                                                                                                                                | LCRA1a               | 1   | -   | -   | NA | -   | -   | 2   | 3   | 308 | 1.0  | 114 | 1.8   |
|                                                                                                                                                                        | LCRA1b               | -   | -   | -   | NA | -   | -   | 2   | 2   | 308 | 0.6  | 114 | 1.8   |
|                                                                                                                                                                        | LCRC                 | -   | 1   | -   | NA | -   | -   | 7   | 8   | 308 | 2.6  | 114 | 6.1   |
|                                                                                                                                                                        | LCRD                 | -   | -   | -   | NA | -   | -   | 3   | 3   | 308 | 1.0  | 114 | 2.6   |
|                                                                                                                                                                        | LCR2                 | -   | -   | -   | NA | -   | -   | 3   | 3   | 308 | 1.0  | 114 | 2.6   |
|                                                                                                                                                                        | LCR3                 | -   | -   | -   | NA | -   | -   | 1   | 1   | 300 | 0.3  | 114 | 0.9   |
|                                                                                                                                                                        | <b>Total PMD-LCR</b> | 1   | 1   | 0   | NA | 0   | 0   | 18  | 20  | 308 | 6.5  | 114 | 15.8  |
| <b>Segmental Duplications</b>                                                                                                                                          |                      | 1   | -   | -   | NA | 1   | 2   | 2   | 6   | 300 | 2.0  | 114 | 1.8   |
| <b>SelfChain<sup>h</sup></b>                                                                                                                                           |                      | -   | NA  | 2   | NA | NA  | NA  | 8   | 2   | 116 | 1.7  | 114 | 7.9   |
| Repetitive elements                                                                                                                                                    | LINE                 | 7   | NA  | 1   | NA | 19  | 4   | 22  | 53  | 282 | 18.8 | 114 | 19.3  |
|                                                                                                                                                                        | <i>Alu</i>           | 7   | NA  | -   | NA | 7   | 8   | 8   | 30  | 282 | 10.6 | 114 | 7.0   |
|                                                                                                                                                                        | LTR                  | 3   | NA  | 1   | NA | 1   | NA  | 13  | 18  | 158 | 11.4 | 114 | 11.4  |
| <b>Observed/Examined architectures: LCR, SelfChain, LINE, <i>Alu</i>, LTR, Purine/Pyrimidine tracts, Palindromes, Topoisomerase Consensus Cleavage sites, GAG seqs</b> |                      | 8/8 | 1/1 | 3/5 | NA | 4/4 | 3/3 | 5/5 | -   | -   | -    | -   | -     |
| <b>None</b>                                                                                                                                                            |                      | 5   | 12  | 1   | NA | 14  | 110 | 25  | 167 | 308 | 54.2 | 114 | 21.9  |
| <b>Total number of sequenced breakpoint junctions</b>                                                                                                                  |                      | 12  | 14  | 2   | 0  | 42  | 124 | 114 | 308 | 310 | 100  | 114 | 100.0 |

D) PMD-LCRs overlapping breakpoints at the level of aCGH for which sequencing was not possible

|         |                |    |    |   |    |    |    |   |    |
|---------|----------------|----|----|---|----|----|----|---|----|
| PMD-LCR | LCRA1a/ LCRA1b | NA | NA | - | NA | 17 | 12 | 8 | 37 |
|---------|----------------|----|----|---|----|----|----|---|----|



\*Denominator used for calculating percentages.

<sup>a</sup> Number of unique samples. Samples that were studied further in more recent publications were excluded from the original publication count.

<sup>b</sup> Only samples with *PLP1* copy number gain were examined.

<sup>c</sup> Variable numbers due to variability of features examined in each of the published. A feature percentage was calculated based on the total number of samples obtained from studies that examined the corresponding feature. Studies that did not examine the corresponding feature were excluded from the total number.

<sup>d</sup> As observed at the level of aCGH or other high resolution CNV detection method

<sup>e</sup> As reported by authors for previously published cases (Without re-interpreting the data according to proposed parameters, some samples are reported in more than one study)

<sup>f</sup> Chimeric element: DNA rearrangement that occurs through homologous recombination between two *Alu* or LINE elements and generates a single chimeric, *Alu* or LINE element.

<sup>g</sup> NAHR: Homologous recombination between two highly similar non-allelic DNA sequences mediated by a pair of LCRs

<sup>h</sup> Alignments of the human genome with itself found in self-chain track on UCSC

NA: HD-aCGH data not available or specific parameter not evaluated by original authors

NE: Not examined in the majority of previous publications

Dash (-): none

**Table S4.** Microhomeologous sequences at the join-points found in this study.

| No | Sample    | Total No. of Nucleotides | No. of matching Nucleotides | Identity Matching (%) | Putative priming sequence (Top) & Putative target annealing sequence (Bottom)<br>NA indicates no putative priming/target annealing available |
|----|-----------|--------------------------|-----------------------------|-----------------------|----------------------------------------------------------------------------------------------------------------------------------------------|
| 1  | BAB8924-1 | 9                        | 7                           | 78%                   | ACAAGCAAT<br>         <br>ACCA-CAAT                                                                                                          |
| 2  | BAB8924-2 | 8                        | 6                           | 75%                   | GAGGAAAG<br>         <br>GAGCCAAG                                                                                                            |
| 3  | BAB8930   | 10                       | 8                           | 80%                   | TTTCTGTTTA<br>             <br>TTTCTATTGA                                                                                                    |
| 4  | BAB8934-1 | 10                       | 8                           | 80%                   | CATATGAGAA<br>             <br>CATGGGAGAA                                                                                                    |
| 5  | BAB8934-2 | 12                       | 9                           | 75%                   | GACACATCATAG<br>             <br>GACTTATCTTAG                                                                                                |
| 6  | BAB8940   | 10                       | 9                           | 90%                   | GCTCAG-GCA<br>             <br>GCTCAGAGCA                                                                                                    |
| 7  | BAB8944   | 14                       | 10                          | 71%                   | AAAAAAGATT-ACA<br>              NA<br>AAGAACTATTGACA                                                                                         |
| 8  | BAB8947   | 10                       | 7                           | 70%                   | AAGAACATGG<br>            NA<br>AAAAATATAG                                                                                                   |
| 9  | BAB8949-2 | 10                       | 8                           | 80%                   | AGGGGAT-TA<br>             <br>AAGGGATGTA                                                                                                    |
| 10 | BAB8950-1 | 8                        | 6                           | 75%                   | GGGAT-AT<br>             <br>GGGTTCAT                                                                                                        |
| 11 | BAB8953   | 13                       | 10                          | 77%                   | TGGGTTTGG-GAA<br>              NA<br>TGCCTTTGGAGAA                                                                                           |
| 12 | BAB8955   | 8                        | 6                           | 75%                   | CTGFACTC<br>             <br>CTGGACCC                                                                                                        |
| 13 | BAB8957   | 10                       | 7                           | 70%                   | AGTTAAAAAT<br>             <br>AGTTACCAGT                                                                                                    |
| 14 | BAB8959   | 7                        | 5                           | 71%                   | A-ATG-C<br>             <br>AAATGAC                                                                                                          |
| 15 | BAB8964   | 9                        | 7                           | 78%                   | CTGA-AATT<br>              NA<br>CTGACAACT                                                                                                   |

|    |           |    |   |     |                                            |
|----|-----------|----|---|-----|--------------------------------------------|
| 16 | BAB8965-2 | 11 | 9 | 82% | GTATTTTCTGT<br>           <br>GTAATTTTCAGT |
| 17 | BAB8965-3 | 7  | 5 | 71% | GAA-TAG<br>      <br>GATGTAG               |
| 18 | BAB8965-6 | 8  | 7 | 87% | GTTGTCAG<br>       <br>GCTGTCAG            |
| 19 | BAB8967   | 10 | 7 | 70% | GATCGAAGTG<br>         <br>GATC-ACATG      |

**Table S5.** Other features at the join-points found in this study.

| No | Join-points with microhomology | Microhomology |
|----|--------------------------------|---------------|
| 1  | BAB8920-2                      | CTGA          |
| 2  | BAB8922                        | TC            |
| 3  | BAB8926                        | GA            |
| 4  | BAB8928-1                      | ATCTTCTGA     |
| 5  | BAB8928-2                      | AGG           |
| 6  | BAB8937                        | ATC           |
| 7  | BAB8942                        | ACA           |
| 8  | BAB8943                        | TAC           |
| 9  | BAB8945                        | GCT           |
| 10 | BAB8948                        | GGCAT         |
| 11 | BAB8950-2                      | GCC           |
| 12 | BAB8952                        | CCC           |
| 13 | BAB8954                        | AG            |
| 14 | BAB8956                        | TCT           |
| 15 | BAB8961                        | CCA           |

| No | Join-points with Insertions |
|----|-----------------------------|
| 1  | BAB8921                     |
| 2  | BAB8923                     |
| 3  | BAB8929                     |
| 4  | BAB8933                     |
| 5  | BAB8938                     |
| 6  | BAB8946                     |
| 7  | BAB8951                     |
| 8  | BAB8962-1                   |
| 9  | BAB8963                     |
| 10 | BAB8965-4                   |
| 11 | BAB8965-5                   |
| 12 | BAB8966                     |
| 13 | BAB8969                     |

| No | Join-points with chimeric <i>Alus</i> , LINEs, Self-Chains |
|----|------------------------------------------------------------|
| 1  | BAB8923-1 ( <i>Alu</i> )                                   |
| 2  | BAB8934-3 ( <i>Alu</i> )                                   |
| 3  | BAB8942-3 ( <i>Alu</i> )                                   |
| 4  | BAB8920-1 (LINE)                                           |
| 5  | BAB8959-3 (Self-Chain)                                     |

| No | Join-points with blunt end |
|----|----------------------------|
| 1  | BAB8949-1                  |
| 2  | BAB8965-1                  |

| No | Join-points with 1 bp sequence match |
|----|--------------------------------------|
| 1  | BAB8935                              |
| 2  | BAB8959-1                            |
| 3  | BAB8962-2                            |

**Table S6.** Microhomeologous sequences at the join-points found by re-analyzing breakpoint sequences from previous studies.

| No | Sample      | Total No. of Nucleotides | No. of matching Nucleotides | Identity Matching (%) | Putative priming sequence (Top) & Putative target annealing sequence (Bottom)<br>NA indicates no putative priming/target annealing available | Previously reported microhomology | Reference |
|----|-------------|--------------------------|-----------------------------|-----------------------|----------------------------------------------------------------------------------------------------------------------------------------------|-----------------------------------|-----------|
| 1  | P026        | 11                       | 8                           | 73%                   | CTGACACCTCA<br>         <br>CTCAGTCCTCA                                                                                                      | CCTCA<br>    <br>CCTCA            | 1         |
| 2  | P083        | 5                        | 4                           | 80%                   | ACA-A<br>     <br>ACATA                                                                                                                      | ACA<br>   <br>ACA                 | 1         |
| 3  | P116        | 6                        | 5                           | 83%                   | CAATGA<br>      <br>CAGTGA                                                                                                                   | TGA<br>   <br>TGA                 | 1         |
| 4  | P176 (PMD7) | 8                        | 7                           | 87%                   | ATAA-TAT<br>        <br>ATAACTAT                                                                                                             | TAT<br>   <br>TAT                 | 1         |
| 5  | P224        | 6                        | 5                           | 83%                   | AAGGTC<br>      <br>AA-GTC                                                                                                                   | GTC<br>   <br>GTC                 | 1         |
| 6  | PMD9        | 7                        | 5                           | 71%                   | CTGCCTG<br>      <br>CT--CTG                                                                                                                 | CTG<br>   <br>CTG                 | 1         |
| 7  | BAB2448     | 13                       | 10                          | 77%                   | TGGGTTGG-GAA<br>            NA<br>TGCCTTGGAGAA                                                                                               | TTTGG<br>    <br>TTTGG            | 2         |
| 8  | 1264-2      | 14                       | 11                          | 79%                   | AGTCCAGTTAGCCC<br>             <br>AGTTCAGTG-GCCC                                                                                            | AGT<br>   <br>AGT                 | 2         |
| 9  | BAB2867     | 7                        | 5                           | 71%                   | TTCATCA<br>       <br>TCCATGA                                                                                                                | CAT<br>   <br>CAT                 | 3         |
| 10 | P250        | 10                       | 8                           | 80%                   | TTGACTGGCC<br>         <br>TTGA--GGCC                                                                                                        | -                                 | 4         |
| 11 | P255        | 7                        | 5                           | 71%                   | AATGCTC<br>       <br>AAAGCCC                                                                                                                | AA<br>  <br>AA                    | 4         |
| 12 | P820        | 12                       | 9                           | 75%                   | ATT-AGGAGAAA<br>            <br>ATTGATGAGCAA                                                                                                 | AA<br>  <br>AA                    | 4         |
| 13 | P1150-1     | 7                        | 5                           | 71%                   | AGG-AAG<br>      <br>AGTCAAG                                                                                                                 | AG<br>  <br>AG                    | 4         |
| 14 | P1407       | 7                        | 5                           | 71%                   | TGCTCAT<br>       <br>TG-TCCT                                                                                                                | TG<br>  <br>TG                    | 4         |
| 15 | J003-1      | 6                        | 5                           | 83%                   | AGAGCC<br>      <br>AGATCC                                                                                                                   | CC<br>  <br>CC                    | 5         |
| 16 | J003-2      | 13                       | 10                          | 77%                   | AGAAATGCAG-CA<br>            <br>AGAAAAG-AGACA                                                                                               | AGAAA<br>    <br>AGAAA            | 5         |

|    |        |    |    |     |                                                      |                         |   |
|----|--------|----|----|-----|------------------------------------------------------|-------------------------|---|
| 17 | J016   | 10 | 7  | 70% | TTTTGATACA<br>           NA<br>TTTAGAAAAA            | GA<br>  <br>GA          | 5 |
| 18 | J029-2 | 6  | 5  | 83% | GGTATG<br>      <br>GGGATG                           | ATG<br>   <br>ATG       | 5 |
| 19 | J035   | 9  | 7  | 78% | GCTAGAGTA<br>         <br>GCT-GAGGA                  | GCT<br>   <br>GCT       | 5 |
| 20 | J038   | 7  | 5  | 71% | GTAAAC<br>       NA<br>GCTATAC                       | TA<br>  <br>TA          | 5 |
| 21 | J041   | 8  | 6  | 75% | ATCCTCCA<br>       <br>ATC--CCA                      | CCA<br>   <br>CCA       | 5 |
| 22 | J050-2 | 8  | 7  | 87% | AATACTGT<br>        <br>AAGACTGT                     | ACTGT<br>     <br>ACTGT | 5 |
| 23 | J065   | 10 | 7  | 70% | ATTGCATCAC<br>          <br>ATTA-ATAAC               | ATT<br>   <br>ATT       | 5 |
| 24 | J068-1 | 7  | 5  | 71% | CAAGAAC<br>       <br>C-AGACC                        | C<br> <br>C             | 5 |
| 25 | J068-2 | 8  | 6  | 75% | TTCTCCGT<br>       <br>TTCT--GT                      | TTCT<br>    <br>TTCT    | 5 |
| 26 | J079-1 | 15 | 11 | 73% | ATGAATGAAATTGTA<br>             <br>ATGAA--AA--TGTA  | ATGAA<br>     <br>ATGAA | 5 |
| 27 | J080   | 8  | 7  | 87% | CAGGCCCA<br>        <br>CAGGCACA                     | CAGGC<br>     <br>CAGGC | 5 |
| 28 | J082   | 15 | 12 | 80% | TGC-CCAGGCTGGAC<br>             <br>TGCACCAGGCA-GAC  | TGC<br>   <br>TGC       | 5 |
| 29 | J083   | 8  | 6  | 75% | CTTC-ACT<br>        <br>CTGCAACT                     | ACT<br>   <br>ACT       | 5 |
| 30 | J102   | 14 | 11 | 79% | TTG--CTATACAAG<br>             <br>TTGAGC-AGACAAG    | TTG<br>   <br>TTG       | 5 |
| 31 | J103   | 7  | 6  | 86% | ATATGTC<br>        <br>ATATCTC                       | ATAT<br>    <br>ATAT    | 5 |
| 32 | J108   | 15 | 11 | 73% | AAAATTATGAGATTT<br>              <br>AAAATC-TCAGACTT | AAAAT<br>     <br>AAAAT | 5 |

## References

1. Woodward KJ, Cundall M, Sperle K, Sistermans EA, Ross M, Howell G, et al. Heterogeneous duplications in patients with Pelizaeus-Merzbacher disease suggest a mechanism of coupled homologous and nonhomologous recombination. *Am J Hum Genet.* 2005;77:966–87.
2. Lee JA, Carvalho CMB, Lupski JR. A DNA Replication Mechanism for Generating Nonrecurrent Rearrangements Associated with Genomic Disorders. *Cell.* 2007;131:1235–47.
3. Carvalho CMB, Bartnik M, Pehlivan D, Fang P, Shen J, Lupski JR. Evidence for disease penetrance relating to CNV size: Pelizaeus-Merzbacher disease and manifesting carriers with a familial 11 Mb duplication at Xq22. *Clin Genet.* 2012;81:532–41.
4. Beck CR, Carvalho CMB, Banser L, Gambin T, Stubbolo D, Yuan B, et al. Complex Genomic Rearrangements at the *PLP1* Locus Include Triplication and Quadruplication. *PLoS Genet.* 2015;11:1–26.
5. Zhang L, Wang J, Zhang C, Li D, Carvalho CMB, Ji H, et al. Efficient CNV breakpoint analysis reveals unexpected structural complexity and correlation of dosage-sensitive genes with clinical severity in genomic disorders. *Hum Mol Genet.* 2017;26:1927–41.
